# Supplementary material
Source: PubMed Central journal article supplement (PMC9718635)
Supplement: NIHMS1836085-supplement-sup.pdf [file NIHMS1836085-supplement-sup.pdf]

**Supplemental Figure 1: Sensitivity Analysis of Efficacy of Solriamfetol in Participants With or Without a History of Depression<sup>a</sup>**

**(A) Mean Sleep Latency on Maintenance of Wakefulness Test**

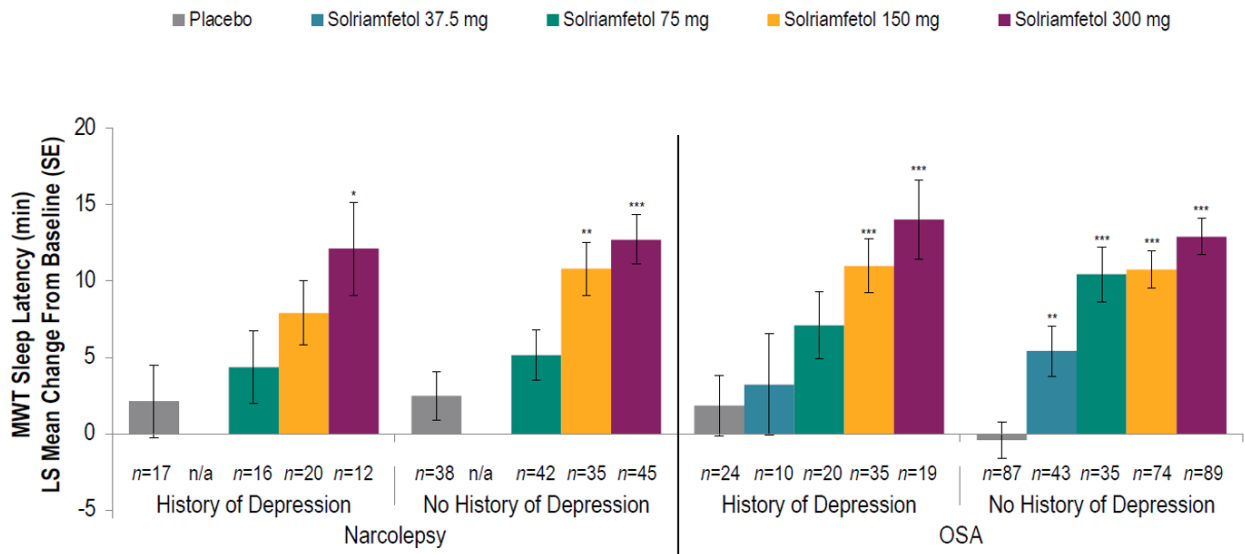

**(B) Epworth Sleepiness Scale Scores**

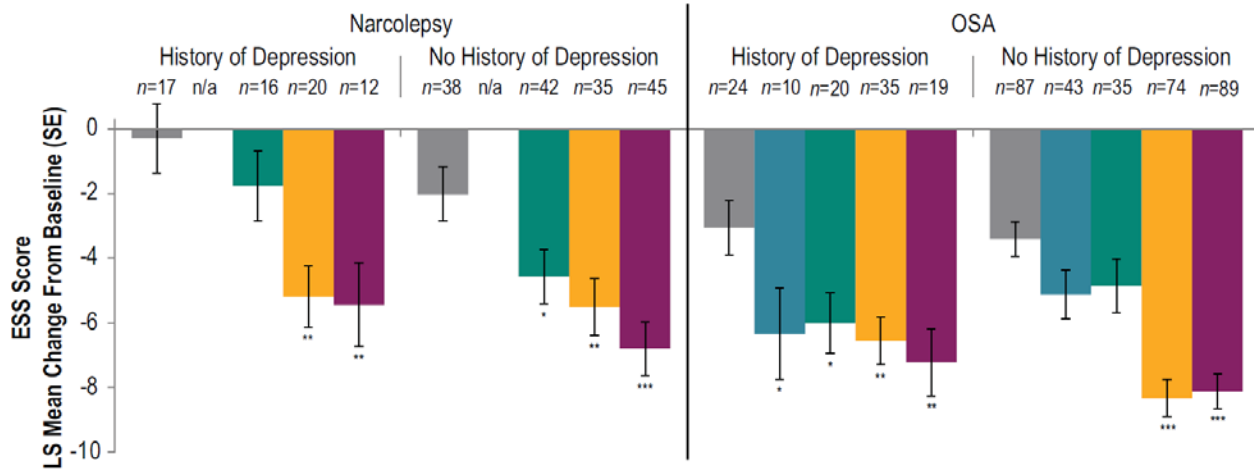

**(C) Improvement on Patient Global Impression of Change<sup>b</sup>**

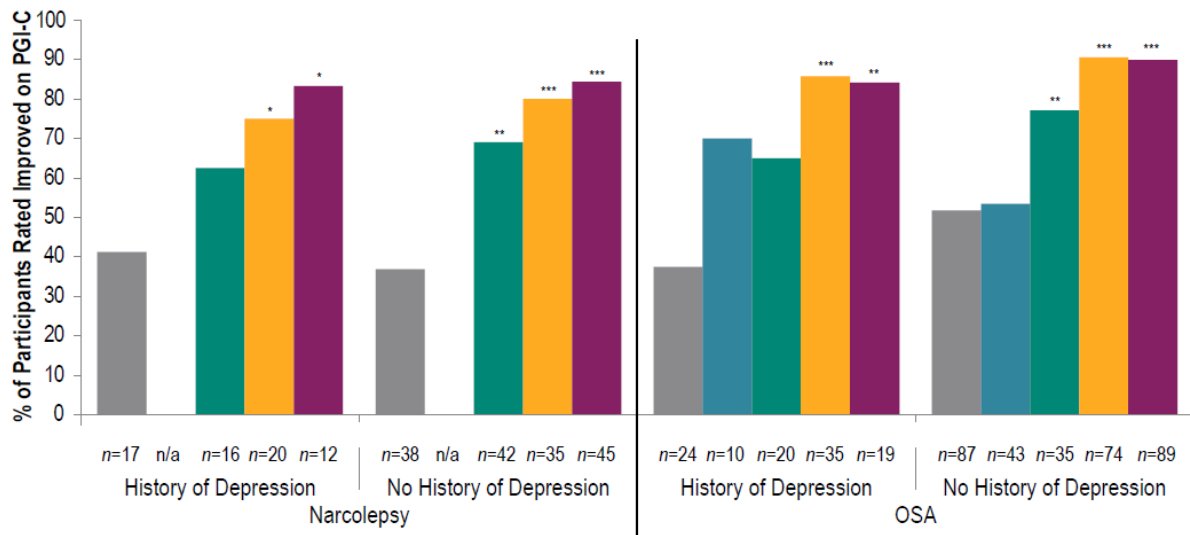

<sup>a</sup>Excluding participants without a history of depression who were using concomitant antidepressants. <sup>b</sup>Improvement defined as *minimally, much, or very much improved*. \* $P < 0.05$  vs placebo. \*\* $P < 0.01$  vs placebo. \*\*\* $P < 0.0001$  vs placebo.  $P$  values are nominal. Note: Higher mean sleep latency on the MWT indicates greater ability to stay awake and less severe EDS, whereas higher scores on the ESS represent more severe EDS (Johns, 1991; Littner et al., 2005). ESS, Epworth Sleepiness Scale; LS, least squares; MWT, Maintenance of Wakefulness Test; n/a, not applicable; OSA, obstructive sleep apnea; PGI-C, Patient Global Impression of Change; SE, standard error.

**Supplemental Table 1. Terms Used to Identify History of Depression in Medical History at Screening**

| Preferred Term,<br><i>n</i> (%) | Narcolepsy                 |                                              | OSA                         |                                              |
|---------------------------------|----------------------------|----------------------------------------------|-----------------------------|----------------------------------------------|
|                                 | Placebo<br>( <i>N</i> =59) | Combined<br>Solriamfetol<br>( <i>N</i> =177) | Placebo<br>( <i>N</i> =119) | Combined<br>Solriamfetol<br>( <i>N</i> =355) |
| Affective disorder              | 0                          | 1 (1)                                        | 0                           | 0                                            |
| Depression                      | 17 (29)                    | 44 (25)                                      | 22 (19)                     | 82 (23)                                      |
| Depressed mood                  | 0                          | 0                                            | 1 (1)                       | 0                                            |
| Major depression                | 0                          | 1 (1)                                        | 1 (1)                       | 3 (1)                                        |
| Postpartum depression           | 0                          | 3 (2)                                        | 1 (1)                       | 0                                            |
| Seasonal affective disorder     | 0                          | 0                                            | 1 (1)                       | 0                                            |

OSA, obstructive sleep apnea.

**Supplemental Table 2. Sensitivity Analysis of Rates of Common TEAEs in Participants With or Without a History of Depression<sup>a,b</sup>**

| Preferred Term,<br><i>n</i> (%)          | Narcolepsy                 |                                             |                            |                                              | OSA                        |                                             |                            |                                              |
|------------------------------------------|----------------------------|---------------------------------------------|----------------------------|----------------------------------------------|----------------------------|---------------------------------------------|----------------------------|----------------------------------------------|
|                                          | History of Depression      |                                             | No History of Depression   |                                              | History of Depression      |                                             | No History of Depression   |                                              |
|                                          | Placebo<br>( <i>N</i> =17) | Combined<br>Solriamfetol<br>( <i>N</i> =48) | Placebo<br>( <i>N</i> =39) | Combined<br>Solriamfetol<br>( <i>N</i> =125) | Placebo<br>( <i>N</i> =26) | Combined<br>Solriamfetol<br>( <i>N</i> =85) | Placebo<br>( <i>N</i> =90) | Combined<br>Solriamfetol<br>( <i>N</i> =250) |
| <b>Any TEAE</b>                          | 10 (59)                    | 40 (83)                                     | 15 (39)                    | 79 (63)                                      | 11 (42)                    | 57 (67)                                     | 44 (49)                    | 171 (68)                                     |
| <b>Headache</b>                          | 2 (12)                     | 11 (23)                                     | 1 (3)                      | 26 (21)                                      | 2 (8)                      | 4 (5)                                       | 7 (8)                      | 29 (12)                                      |
| <b>Decreased appetite</b>                | 1 (6)                      | 8 (17)                                      | 0                          | 11 (9)                                       | 0                          | 5 (6)                                       | 1 (1)                      | 21 (8)                                       |
| <b>Nausea</b>                            | 1 (6)                      | 7 (15)                                      | 0                          | 12 (10)                                      | 0                          | 7 (8)                                       | 7 (8)                      | 19 (8)                                       |
| <b>Anxiety</b>                           | 0                          | 5 (10)                                      | 1 (3)                      | 3 (2)                                        | 0                          | 8 (9)                                       | 0                          | 16 (6)                                       |
| <b>Insomnia</b>                          | 0                          | 4 (8)                                       | 0                          | 1 (1)                                        | 0                          | 2 (2)                                       | 1 (1)                      | 12 (5)                                       |
| <b>Upper respiratory tract infection</b> | 1 (6)                      | 4 (8)                                       | 0                          | 1 (1)                                        | 0                          | 3 (4)                                       | 3 (3)                      | 0                                            |
| <b>Dry mouth</b>                         | 0                          | 3 (6)                                       | 2 (5)                      | 10 (8)                                       | 0                          | 7 (8)                                       | 2 (2)                      | 9 (4)                                        |
| <b>Fatigue</b>                           | 0                          | 3 (6)                                       | 0                          | 2 (2)                                        | 1 (4)                      | 0                                           | 1 (1)                      | 4 (2)                                        |
| <b>Nasopharyngitis</b>                   | 2 (12)                     | 5 (10)                                      | 1 (2.6)                    | 11 (9)                                       | 2 (8)                      | 3 (4)                                       | 6 (7)                      | 14 (6)                                       |

<sup>a</sup>Excluding participants without a history of depression who were using concomitant antidepressants. <sup>b</sup>Common TEAEs are those with incidence  $\geq 5\%$  in  $\geq 1$  solriamfetol-treated subgroup. OSA, obstructive sleep apnea; TEAE, treatment-emergent adverse event.
